# Supplementary material for: Intermittent relaxation and avalanches in extremely persistent active matter
Source: Royal Society of Chemistry journal article supplement (doi:10.1039/d3sm00034f), 2023-01-01
Supplement: d3sm00034f1.pdf [file d3sm00034f1.pdf]

## Supplementary Material to “Intermittent relaxation and avalanches in extremely persistent active matter”

Yann-Edwin Keta,<sup>1</sup> Rituparno Mandal,<sup>2</sup> Peter Sollich,<sup>2,3</sup> Robert L. Jack,<sup>4,5</sup> and Ludovic Berthier<sup>1,4</sup>

<sup>1</sup>Laboratoire Charles Coulomb (L2C), Université de Montpellier, CNRS, 34095 Montpellier, France

<sup>2</sup>Institute for Theoretical Physics, Georg-August-Universität Göttingen, 37077 Göttingen, Germany

<sup>3</sup>Department of Mathematics, King’s College London, London WC2R 2LS, UK

<sup>4</sup>Yusuf Hamied Department of Chemistry, University of Cambridge,  
Lensfield Road, Cambridge CB2 1EW, United Kingdom

<sup>5</sup>Department of Applied Mathematics and Theoretical Physics,  
University of Cambridge, Wilberforce Road, Cambridge CB3 0WA, United Kingdom

(Dated: April 28, 2023)

### A. INTERACTION POTENTIAL

We use a regularised inverse power law  $1/r^{12}$  pairwise additive potential [1] with

$$U_{ij} = \varepsilon \left[ \frac{1}{(r_{ij}/\tilde{\sigma}_{ij})^a} + c_0 + c_1(r_{ij}/\tilde{\sigma}_{ij})^2 + c_2(r_{ij}/\tilde{\sigma}_{ij})^4 \right] \Theta(r_c - r_{ij}/\tilde{\sigma}_{ij}), \quad (\text{A1})$$

$$\tilde{\sigma}_{ij} = \frac{\sigma_i + \sigma_j}{2} (1 - 0.2|\sigma_i - \sigma_j|), \quad (\text{A2})$$

$$a = 12, \quad r_c = 1.25, \quad c_0 = -\frac{8 + a(a + 6)}{8r_c^a}, \quad c_1 = \frac{a(a + 4)}{4r_c^{a+2}}, \quad c_2 = -\frac{a(a + 2)}{8r_c^{a+4}}. \quad (\text{A3})$$

The coefficients  $c_0$ ,  $c_1$ , and  $c_2$  make the potential and its first two derivatives continuous at the cutoff distance  $r_c$  – which is needed by the conjugate gradient minimisation method – and the pair interaction is slightly non-additive to improve the glass-forming ability of the system. The continuity of the second derivative of the potential is a necessary condition for the convergence of our conjugate gradient algorithm.

### B. ELASTIC DISPLACEMENTS

We consider the Hessian matrix  $\mathbb{H}$  with elements

$$H_{i\gamma,j\delta} = \frac{\partial^2}{\partial r_i^\gamma \partial r_j^\delta} U \quad (\text{B1})$$

where Greek indices are used for spatial dimensions and Latin indices for particles. Eq. (12) is equivalent to

$$-\sum_{j,\delta} H_{i\gamma,j\delta} \delta r_j^\delta + \Xi_{i\gamma} = 0 \quad (\text{B2})$$

and can be inverted as

$$\delta r_{i\gamma} = \sum_{j,\delta} (H^{-1})_{i\gamma,j\delta} \Xi_{j\delta}. \quad (\text{B3})$$

The Hessian matrix  $\mathbb{H}$  is symmetric and real-valued so that, by virtue of the spectral theorem, there exists an orthonormal basis of eigenvectors  $\mathbf{e}_a$ , associated with eigenvalues  $\Lambda_a$ , that diagonalises it:

$$H_{i\gamma,j\delta} = \sum_a \Lambda_a e_{a,i\gamma} e_{a,j\delta}. \quad (\text{B4})$$

Introducing the projection of the affine force along eigenvector  $\mathbf{e}_a$ ,

$$\Xi_a = \sum_{j,\delta} \Xi_{j\delta} e_{a,j\delta} \quad (\text{B5})$$

and employing the diagonalised form of the Hessian, Eq. (B3) then becomes

$$\delta r_{i\gamma} = \sum_a \Xi_a \Lambda_a^{-1} e_{a,i\gamma}. \quad (\text{B6})$$

Here we have implicitly omitted eigenvectors with zero eigenvalues  $\Lambda_a = 0$ : these correspond to translations, which are explicitly excluded from  $\delta r_{i\gamma}$  as we work in the centre-of-mass frame.

We now approximate the eigenvectors of  $\mathbb{H}$  as the transverse and longitudinal plane wave eigenstates of the Navier operator [2, 3] for the displacement field in an elastic medium, with the associated eigenvalues proportional to the square of the wavevector,

$$\mathbf{a} \equiv (m, n, \alpha), \quad \Xi_a \equiv \Xi_{mn}^\alpha, \quad e_{a,i\gamma} \approx e^{i\mathbf{k}_{mn} \cdot \mathbf{r}_i} \hat{k}_{mn\gamma}^\alpha / N, \quad \Lambda_a \approx \lambda^\alpha (m^2 + n^2) / N \quad (\text{B7})$$

where  $\alpha = \parallel, \perp$  is the polarisation direction,  $\mathbf{k}_{mn} = (2\pi m/L, 2\pi n/L)$  is the wavevector,  $\hat{\mathbf{k}}_{mn}^\parallel = \mathbf{k}_{mn} / |\mathbf{k}_{mn}|$ , and  $\hat{\mathbf{k}}_{mn}^\perp = \mathbf{e}_z \times \hat{\mathbf{k}}_{mn}^\parallel$ . The displacement field (B6) can then be written as

$$\delta r_{i\gamma} = \sum_{m,n,\alpha} \Xi_{mn}^\alpha \frac{e^{i\mathbf{k}_{mn} \cdot \mathbf{r}_i} \hat{k}_{mn\gamma}^\alpha}{\lambda^\alpha (m^2 + n^2)} \quad (\text{B8})$$

which is equivalent to Eq. (14).

We have checked numerically that the approximate plane wave eigenvectors are still orthonormal to  $\mathcal{O}(1/N)$ , and that the projections of the affine forces  $\Xi_i$  onto both the exact and the approximate eigenvectors of the Hessian  $\mathbb{H}$  all have the same variance within statistical accuracy.

### C. RESIDUAL FORCE

We compute the Taylor expansion of the force at time  $t$ :

$$\begin{aligned} -\nabla U(\mathbf{r}(t)) &= -\nabla U((\mathbf{r}(t) - \mathbf{r}(0)) + \mathbf{r}(0)) = -\nabla U(\mathbf{r}(0)) - \mathbb{H}(0)(\mathbf{r}(t) - \mathbf{r}(0)) + \mathcal{O}(|\mathbf{r}(t) - \mathbf{r}(0)|^2) \\ &= -\nabla U(\mathbf{r}(0)) + \mathbf{f}_{\text{lin}}(t) + \mathbf{f}_{\text{res}}(t) \end{aligned} \quad (\text{C1})$$

where  $\mathbb{H}(0)$  is the Hessian matrix computed at time 0,  $\mathbf{f}_{\text{lin}}(t) = -\mathbb{H}(0)(\mathbf{r}(t) - \mathbf{r}(0))$  is the elastic (linear) force corresponding to the displacement field  $\mathbf{r}(t) - \mathbf{r}(0)$ , and  $\mathbf{f}_{\text{res}}(t)$  is the residual force. The effective potential energy  $U_{\text{eff}}$  (7) is minimised at all times, therefore

$$\begin{aligned} -\nabla U(\mathbf{r}(t)) + \mathbf{p}(t) - \overline{\mathbf{p}(t)} &= -\nabla U(\mathbf{r}(0)) + \mathbf{p}(0) - \overline{\mathbf{p}(0)} = 0 \\ \Leftrightarrow \mathbf{f}_{\text{res}}(t) &= -\mathbf{f}_{\text{lin}}(t) - [(\mathbf{p}(t) - \overline{\mathbf{p}(t)}) - (\mathbf{p}(0) - \overline{\mathbf{p}(0)})] \\ \Leftrightarrow \mathbf{f}_{\text{res}}(t) &= \mathbb{H}(0)(\mathbf{r}(t) - \mathbf{r}(0)) - [(\mathbf{p}(t) - \overline{\mathbf{p}(t)}) - (\mathbf{p}(0) - \overline{\mathbf{p}(0)})]. \end{aligned} \quad (\text{C2})$$

One sees that  $\mathbf{f}_{\text{res}}(t)$  vanishes if and only if the displacement associated with the change in propulsion is purely elastic.

We plot in Fig. C1 the log-distribution of  $|\mathbf{f}_{\text{res}}(t)|$  for different rescaled times  $t' = t/\tau_p$ . At intermediate times, the log-distribution is bimodal, with the 2 peaks separated by the value  $|\mathbf{f}_{\text{res}}| \approx 20$ . This is similar to what is observed for supercooled liquids (Ref. [4], Fig. SM4), and we thus use  $|\mathbf{f}_{\text{res}}| \approx 20$  as the threshold to identify rearranging particles.

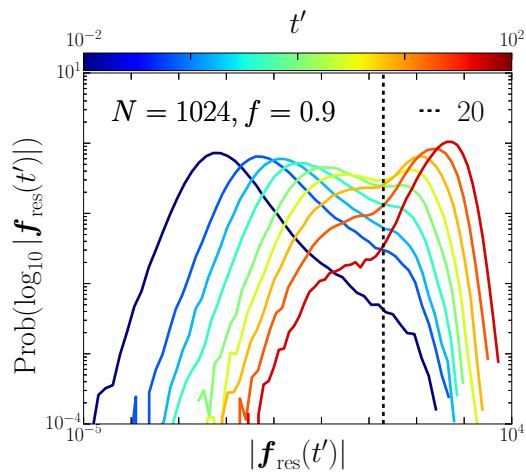

FIG. C1. Log-distribution of residual force (C2) for different lag times  $t' = t/\tau_p$ .

- 
- [1] Andrea Ninarello, Ludovic Berthier, and Daniele Coslovich, “Models and Algorithms for the Next Generation of Glass Transition Studies,” *Physical Review X* **7**, 021039 (2017).
  - [2] William S. Slaughter, *The Linearized Theory of Elasticity* (Birkhäuser Boston, Boston, MA, 2002).
  - [3] C. E. Maloney, “Correlations in the Elastic Response of Dense Random Packings,” *Physical Review Letters* **97**, 035503 (2006).
  - [4] Matthias Lerbinger, Armand Barbot, Damien Vandembroucq, and Sylvain Patinet, “Relevance of shear transformations in the relaxation of supercooled liquids,” *Phys. Rev. Lett.* **129**, 195501 (2022).
